# Supplementary material for: Hydrogel-embedded vertically aligned metal-organic framework nanosheet membrane for efficient water harvesting
Source: PubMed Central journal article supplement (PMC11555079; doi:10.1038/s41467-024-54215-z), 2024-11-11
Supplement: 41467_2024_54215_MOESM2_ESM.pdf [file 41467_2024_54215_MOESM2_ESM.pdf]

## **Description of Additional Supplementary Files**

**File Name: Supplementary Movie 1**

**Description:** Ultrafast water absorption process of MOF-CT/PVA
